# Supplementary material
Source: PubMed Central journal article supplement (PMC2710688)
Supplement: 0809980106_0809980106SI.pdf [file 0809980106_0809980106SI.pdf]

# Supporting Information

Chen et al. 10.1073/pnas.0809980106

## SI Methods

**Household Surveys.** The GTGP enrollment took place in Wolong Nature Reserve in 2000, 2001, and 2003. For the 304 GTGP enrolled households in our sample, 297 (97.7%), 5 (1.6%) and 2 (0.7%) of them enrolled in the GTGP in 2000, 2001, and 2003, respectively. Among those households that enrolled in 2000, 176 and 65 of them added more land plots in the program in 2001 and 2003 respectively. For the 5 households that enrolled in 2001, 1 of them added more land plots in the program in 2003. In a total of 735 land plots that were enrolled by households in our sample, 62.9%, 27.2%, and 9.9% of them were enrolled in 2000, 2001, and 2003, respectively. We tested the potential impacts of the number of years enrolled in the program on the re-enrollment intention, and found that the number of years enrolled in the program did not have a significant impact on the re-enrollment intention.

Among the households in our sample, 98 of them (32.2%) planned to reconvert at least some of their GTGP land plots to crop production after the GTGP ends and payment ceases. The number of land plots for reconversion (166) accounts for 22.6% of a total of 735. This low reconversion rate is not unique. Even lower planned reconversion rates (<20%) have been found in several other places in China (1–3). Although the reconversion rate is low, the land plots chosen for reconversion may be important to ecosystem services, such as the connectivity of panda habitat in Wolong, because they are often scattered among enrolled land plots.

As suggested by two very influential theories of intention–behavior relationship, namely the theories of reasoned action and planned behavior (4–6), intention is very often the strongest predictor of actual behavior (7–9). These theories specify three conditions that affect the magnitude of the relationship between intention and behavior: the degree of correspondence of specificity between the measure of intention and behavior; the degree of an individual’s volitional control of carrying out the intention; and stability of intention during the time of measurement and performance of the behavior (6, 9). To improve the consistency between people’s intentions and actual behaviors, our policy scenarios specify conservation payment and program duration, which are also attributes of the current GTGP as well as many other PES programs, and therefore are familiar to respondents. In addition, we selected household heads or their spouses as our interviewees because they are usually the decision makers for household affairs, and have the most volitional control over participation in PES programs.

Previous studies in this reserve demonstrated that respondents’ intentions generally reflected their behaviors. For instance, An et al. (10) studied the stated intentions of switching from fuelwood to electricity for energy use based on a survey of 220 (a subset of sample in our study) randomly selected households in 1999. Using a similar discrete choice model as used in our study, An et al. found that lower electricity prices, higher household income, higher voltage and better stability of electricity would increase respondents’ intentions of switching from fuelwood to electricity. Although the price of electricity has since increased from 0.08 Yuan to 0.18 Yuan per kW\*h in 2001, each household has been subsidized by the government with an annual payment of ≈900 Yuan (≈20% of average household income in 2001) that can be used for electricity purchase. This subsidy

offsets the cost due to the price increase. Moreover, the voltage and stability of electricity have been greatly improved due to the reconstruction of electricity networks in 2001. As a result, a substantial amount of energy use has been switched from fuelwood to electricity (11), as suggested by the stated intentions data and model results of An et al. (10).

Using other data from the survey in 1999, An et al. (12, 13) studied intentions of young adults moving from their parental homes to establish their own households. Based on young adults’ intentions, An et al. predicted that the number of households would increase at a faster rate than the population due to the implied trend of household sizes in the reserve. From 1999 to 2005, the number of households increased 22.1% (from 947 to 1,156) while the population sized increased only 4.5% (from 4,354 to 4,550) due to the decrease in average household size from 4.60 to 3.94 (14), which is consistent with the previously stated intentions of young adults in the reserve.

Meta-analyses covering diverse behavioral domains have reported moderate to high correlations between intention and behavior (15, 16). For instance, based on intentions of Conservation Reserve Program (CRP) participants from a national survey in the United States in 1993, Cooper et al. (17) predicted that ≈50% of CRP acreage can be renewed at the original cost of \$50 per acre. After its original contract matured, the average cost of the renewed CRP contract was similar to its original cost (e.g., the average cost in 2001 was \$46.4 per acre) (18). By the end of 2001, ≈55% of CRP acres were re-enrolled from previous contracts (19), which reflected stated intentions of CRP participants. Moreover, stated choice methods are commonly used in marketing situations where actual decisions cannot be observed (e.g., due to new or novel products). In the context of purchase decisions, the literature has also found that stated and actual choices often correspond well (20, 21), especially in settings where respondents are familiar with the decision making context (22, 23).

Moreover, both intention and behavior have been used in studies of the impacts of social norms on individual’s actions. For instance, studies in diffusions of innovation found that intentions of technology adoption were significantly affected by social norms (24–26). When behaviors of technology adoption, instead of intentions, were used, social norms were also found to have significant impacts (27–29).

**Econometric model.** Empirically, utility functions  $U_i^1$  and  $U_i^0$  can be given by  $U_i^1 = X_i^1\beta^1 + \varepsilon_i^1$  and  $U_i^0 = X_i^0\beta^0 + \varepsilon_i^0$ . Hence, a re-enrollment decision is modeled as

$$\begin{aligned} \Pr(Y_i = 1) &= \Pr(U_i^1 > U_i^0) = \Pr(X_i^1\beta^1 + \varepsilon_i^1 > X_i^0\beta^0 + \varepsilon_i^0) \\ &= \Pr(X_i\beta + \varepsilon_i > 0) = \Pr(\varepsilon_i > -X_i\beta) = 1 - F(-X_i\beta), \end{aligned} \quad [\text{s1}]$$

where  $\beta$  is a parameter vector,  $X_i$  combines utility-related variables, and  $\varepsilon_i$  is an error term. When  $\varepsilon_i$  is assumed to have a normal distribution,  $\Pr(Y_i = 1) = 1 - \Phi(-X_i\beta)$ , where  $\Phi(\cdot)$  is the cumulative normal distribution, and the probit model can be used for estimation. Parameters estimation is conducted in STATA 9.0.

1. Ge W, Li L, Li Y (2006) On sustainability of Grain to Green Program. *For Econ* 11:33–49 (in Chinese).

2. Bao J, Tang D, Chen B (2005) Socioeconomic effects of Grain to Green Program in Sichuan Province. *Sichuan For Explor Des* 1:26–32 (in Chinese).

3. Liu K (2005) Participants' plans after Grain to Green Program ends. *Green China* 4:30–31 (in Chinese).
4. Ajzen I (1985) From intentions to actions: A theory of planned behavior. *Action-Control: From Cognition to Behavior*, eds Kuhl J, Beckmann J (Springer, Heidelberg), pp 11–39.
5. Ajzen I, Fishbein M (1980) *Understanding Attitudes and Predicting Social Behavior* (Prentice Hall, Englewood Cliffs, NJ).
6. Fishbein M, Ajzen I (1975) *Belief, Attitude, Intention and Behavior: An Introduction to Theory and Research* (Addison-Wesley, Reading, MA).
7. Terry DJ, Hogg MA (1996) Group norms and the attitude-behavior relationship: A role for group identification. *Pers Soc Psychol B* 22:776–793.
8. Schultz PW, Oskamp S (1996) Effort as a moderator of the attitude-behavior relationship: General environmental concern and recycling. *Soc Psychol Q* 59:375–383.
9. Madden TJ, Ellen PS, Ajzen I (1992) A comparison of the theory of planned behavior and the theory of reasoned action. *Pers Soc Psychol B* 18:3–9.
10. An L, Lupi F, Liu J, Linderman MA, Huang J (2002) Modeling the choice to switch from fuelwood to electricity Implications for giant panda habitat conservation. *Ecol Econ* 42:445–457.
11. He GM (2008) Balancing human energy needs and conservation of panda habitat. PhD dissertation (Michigan State Univ, East Lansing, MI).
12. An L, Mertig AG, Liu JG (2003) Adolescents leaving parental home: Psychosocial correlates and implications for conservation. *Popul Environ* 24:415–444.
13. An L, Linderman M, Qi J, Shortridge A, Liu J (2005) Exploring complexity in a human-environment system: An agent-based spatial model for multidisciplinary and multi-scale integration. *Ann Assoc Am Geogr* 95:54–79.
14. Wolong Nature Reserve (2005) *History of the Development of Wolong Nature Reserve* (Sichuan Sci, Chengdu, China) (in Chinese).
15. Armitage CJ, Conner M (2001) Efficacy of the theory of planned behaviour: A meta-analytic review. *Br J Soc Psychol* 40:471–499.
16. Sheppard BH, Hartwick J, Warshaw PR (1988) The theory of reasoned—A meta-analysis of past research with recommendations for modifications and future-research. *J Consum Res* 15:325–343.
17. Cooper JC, Osborn CT (1998) The effect of rental rates on the extension of conservation reserve program contracts. *Am J Agric Econ* 80:184–194.
18. Barbarika A (2001) Conservation reserve program: Program summary and enrollment statistics as of August 2001. (Farm Serv Ag, U.S. Dep of Agric, Washington, DC.).
19. Claassen R, Cattaneo A, Johansson R (2008) Cost-effective design of agri-environmental payment programs: US experience in theory and practice. *Ecol Econ* 65:737–752.
20. Rubey L, Lupi F (1997) Predicting the effects of market reform in Zimbabwe: A stated preference approach. *Am J Agric Econ* 79:89–99.
21. Loureiro ML, McCluskey JJ, Mittelhammer RC (2003) Are stated preferences good predictors of market behavior? *Land Econ* 79:44–55.
22. Louviere JJ, Hensher DA, Swait JD (2000) *Stated Choice Methods : Analysis and Applications* (Cambridge Univ Press, Cambridge, UK).
23. Carson RT, et al. Experimental analysis of choice (1994) *Market Lett* 5:351–367.
24. Vermeir I, Verbeke W (2006) Sustainable food consumption: Exploring the consumer "attitude - behavioral intention" gap. *J Agric Environ Ethic* 19:169–194.
25. Dickinger A, Arami M, Meyer D (2008) The role of perceived enjoyment and social norm in the adoption of technology with network externalities. *Eur J Inform Syst* 17:4–11.
26. Yang X, Li Y, Tan CH, Teo HH (2007) Students' participation intention in an online discussion forum: Why is computer-mediated interaction attractive? *Inform Manage* 44:456–466.
27. Zhang XB, Fan SG, Cai XM (2002) The path of technology diffusion: Which neighbors to learn from? *Contemp Econ Policy* 20:470–478.
28. Foster AD, Rosenzweig MR (1995) Learning by doing and learning from others—Human-capital and technical change in agriculture. *J Polit Econ* 103:1176–1209.
29. Case A (1992) Neighborhood influence and technological change. *Reg Sci Urban Econ* 22:491–508.

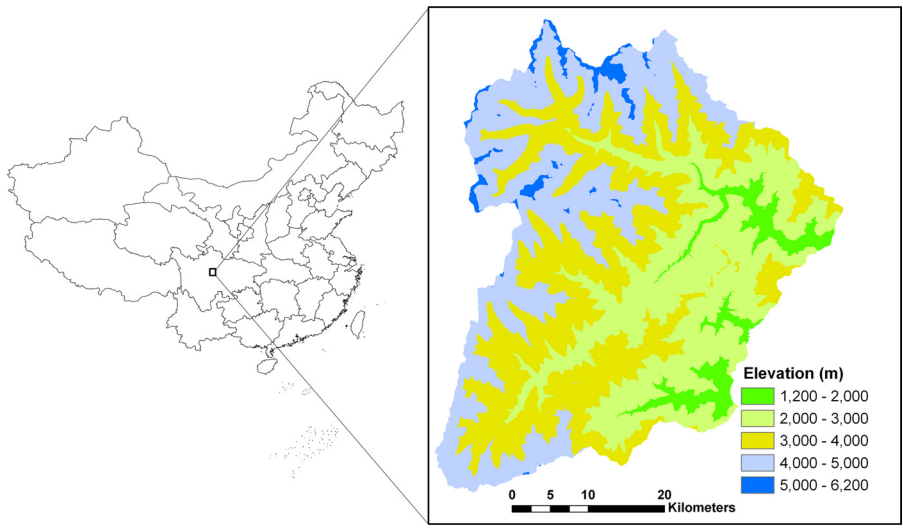

Fig. S1. Location and elevation levels of the study site, Wolong Nature Reserve in China.
